# Supplementary material for: The arrangement of Brachypodium distachyon chromosomes in interphase nuclei
Source: PubMed Central journal article supplement (PMC5049400; doi:10.1093/jxb/erw325), 2016-09-01
Supplement: supp_erw325_Supplementary_Figures_S1_S2.pdf [file supp_erw325_Supplementary_Figures_S1_S2.pdf]

*Journal of Experimental Botany*

**The distribution and behaviour of *Brachypodium distachyon*  
chromosomes at interphase**

Ewa Robaszkiewicz, Dominika Idziak-Helmcke, Magdalena Tkacz,  
Kornel Chromiński and Robert Hasterok

SUPPLEMENTARY DATA

## Supplementary Figure S1

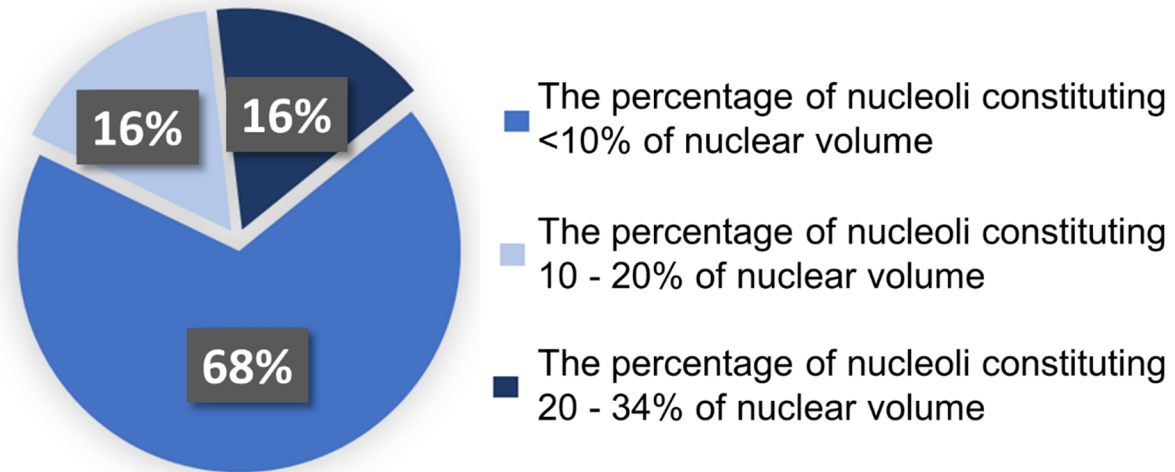

**Supplementary Figure S1.** Volumes of the nucleoli in the root cell nuclei of *B. distachyon*.

## Supplementary Figure S2

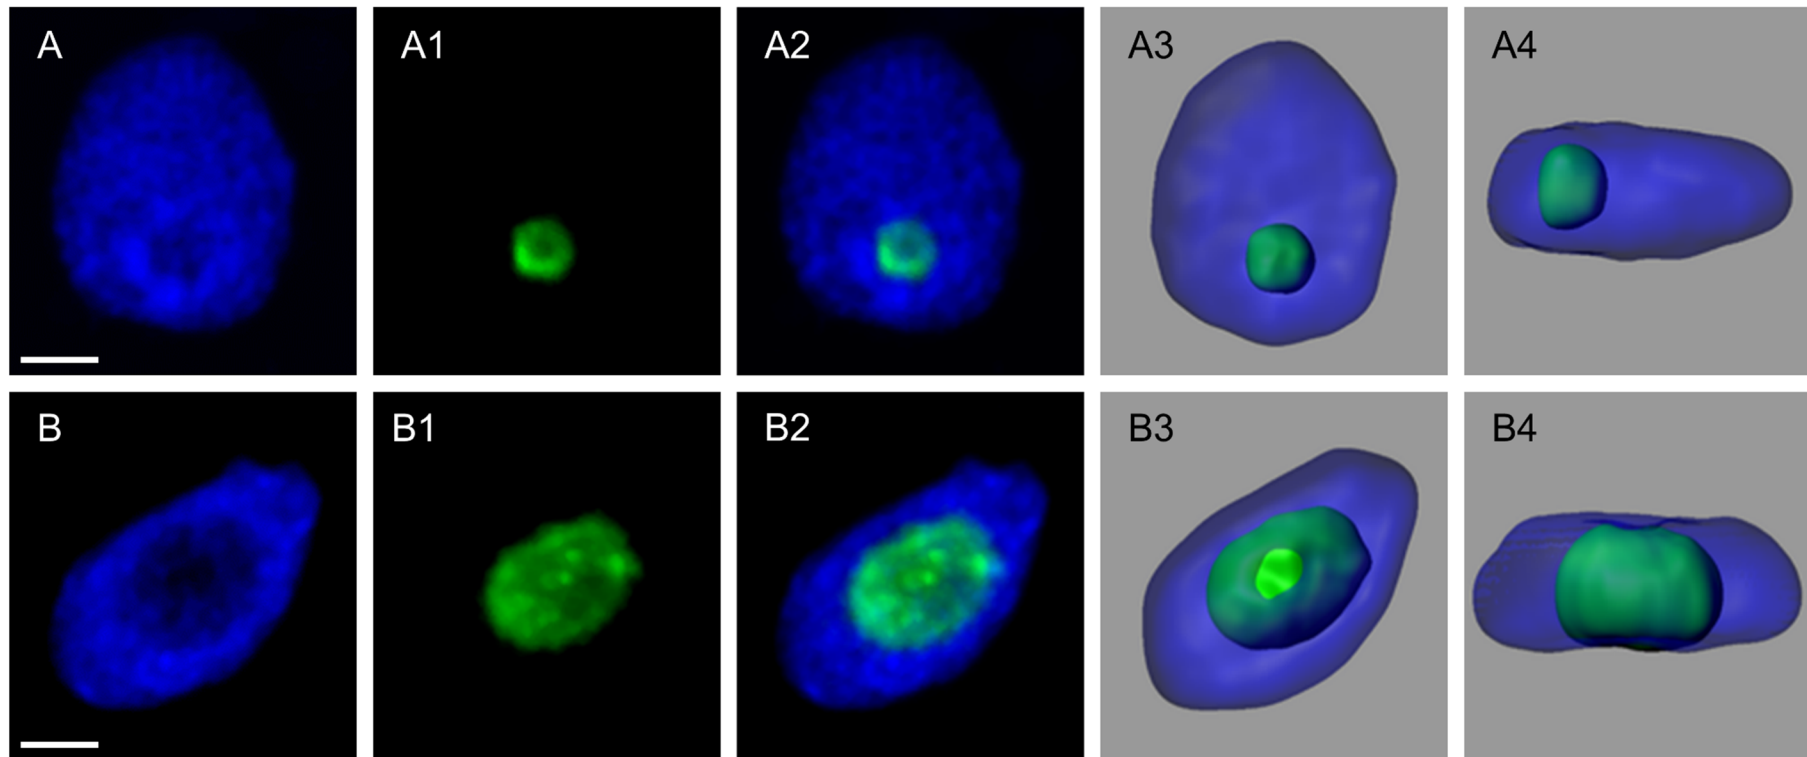

**Supplementary Figure S2.** Size of the nucleoli isolated from *B. distachyon* roots.

(A, B) Interphase nuclei with a similar volume ( $78.7$  and  $73.4 \mu\text{m}^3$ , respectively), counterstained with DAPI (blue fluorescence);

(A1, B1) Nucleoli with a different volume ( $3.8$  and  $23.7 \mu\text{m}^3$ , respectively) detected by immunostaining fibrillarin (green fluorescence);

(A2, B2) Superimposed images of nuclei and nucleoli;

(A3-A4, B3-B4) Models of nuclei and nucleoli prepared using Imaris Software (Bitplane) based on microscopy images and observed in different planes.

Scale bars:  $2 \mu\text{m}$ .
