# Supplementary material for: The arrangement of Brachypodium distachyon chromosomes in interphase nuclei
Source: PubMed Central journal article supplement (PMC5049400; doi:10.1093/jxb/erw325), 2016-09-01
Supplement: supp_erw325_Supplementary_Tables_S1_S5.pdf [file supp_erw325_Supplementary_Tables_S1_S5.pdf]

**Supplementary Table S1. Characteristics of BAC clones used for the chromosome painting of Bd1.**

| <b>Bd1 short arm</b> |                 |                   |                 |                           |
|----------------------|-----------------|-------------------|-----------------|---------------------------|
| <b>No.</b>           | <b>Clone ID</b> | <b>Start [bp]</b> | <b>End [bp]</b> | <b>Repeat content [%]</b> |
| 1                    | a0035K02        | 147863            | 304506          | 18.31                     |
| 2                    | b0027N17        | 560624            | 710332          | 6.56                      |
| 3                    | a0037D23        | 1171403           | 1328435         | 13.07                     |
| 4                    | a0012F06        | 1537097           | 1734409         | 7.59                      |
| 5                    | a0032E05        | 1907231           | 2063694         | 11.83                     |
| 6                    | a0008O14        | 2635548           | 2801693         | 8.30                      |
| 7                    | a0021B03        | 3028832           | 3173186         | 6.23                      |
| 8                    | a0004B12        | 3276891           | 3460444         | 5.68                      |
| 9                    | b0044D24        | 3878248           | 4004060         | 13.91                     |
| 10                   | b0003A11        | 4404030           | 4546882         | 30.82                     |
| 11                   | a0032K13        | 5048843           | 5206517         | 26.89                     |
| 12                   | a0017K22        | 5375697           | 5509098         | 17.71                     |
| 13                   | b0037O18        | 6122656           | 6272292         | 19.17                     |
| 14                   | a0022C04        | 6574012           | 6741405         | 30.61                     |
| 15                   | b0040G07        | 7221475           | 7389553         | 30.09                     |
| 16                   | b0013P15        | 7656602           | 7805960         | 29.21                     |
| 17                   | a0013O16        | 7926543           | 8055682         | 39.20                     |
| 18                   | b0030L10        | 8680898           | 8845282         | 10.03                     |
| 19                   | b0012L20        | 8850673           | 9007358         | 14.08                     |
| 20                   | a0015H06        | 9424591           | 9569999         | 14.80                     |
| 21                   | a0007G23        | 9965773           | 10101237        | 15.91                     |
| 22                   | a0032D10        | 10490542          | 10652198        | 11.18                     |
| 23                   | a0003J21        | 10927667          | 11073109        | 16.93                     |
| 24                   | a0023P13        | 11505702          | 11632287        | 22.48                     |
| 25                   | a0032F08        | 12115980          | 12241228        | 17.12                     |
| 26                   | a0024M10        | 12444261          | 12575731        | 23.81                     |
| 27                   | a0027D04        | 12706461          | 12847057        | 22.87                     |
| 28                   | b0019G20        | 13362834          | 13517753        | 21.02                     |
| 29                   | b0023C02        | 13999817          | 14137163        | 13.45                     |
| 30                   | b0001G04        | 14561692          | 14709543        | 15.53                     |

| <b>Bd1 short arm</b> |                 |                   |                 |                           |
|----------------------|-----------------|-------------------|-----------------|---------------------------|
| <b>No.</b>           | <b>Clone ID</b> | <b>Start [bp]</b> | <b>End [bp]</b> | <b>Repeat content [%]</b> |
| 31                   | a0020A04        | 15092918          | 15238493        | 0.00                      |
| 32                   | b0023O18        | 15449374          | 15577903        | 0.00                      |
| 33                   | a0003N21        | 16107590          | 16251236        | 10.80                     |
| 34                   | a0002N01        | 16344468          | 16496573        | 11.12                     |
| 35                   | a0009N18        | 17150298          | 17335777        | 0.00                      |
| 36                   | a0014L23        | 17404191          | 17543242        | 7.86                      |
| 37                   | b0018P22        | 18190466          | 18326563        | 23.15                     |
| 38                   | a0017E13        | 18574112          | 18708723        | 0.00                      |
| 39                   | a0010I03        | 19198770          | 19342731        | 7.06                      |
| 40                   | a0007L04        | 19364297          | 19511432        | 8.67                      |
| 41                   | b0002O16        | 20013520          | 20160236        | 0.00                      |
| 42                   | a0024N14        | 20488400          | 20631457        | 19.18                     |
| 43                   | a0027K03        | 21168673          | 21307307        | 0.00                      |
| 44                   | a0010K04        | 21496092          | 21643627        | 19.83                     |
| 45                   | a0011I01        | 21907910          | 22040598        | 0.00                      |
| 46                   | a0018B03        | 22412015          | 22565632        | 32.71                     |
| 47                   | b0022H13        | 23114454          | 23242441        | 0.00                      |
| 48                   | a0023E14        | 23230575          | 23392276        | 21.52                     |
| 49                   | a0043B06        | 24028749          | 24191469        | 22.76                     |
| 50                   | a0042C21        | 24228323          | 24375228        | 16.48                     |
| 51                   | a0026E19        | 25017625          | 25161139        | 14.31                     |
| 52                   | a0046B12        | 25556278          | 25718695        | 17.60                     |
| 53                   | a0018O15        | 25727688          | 25878318        | 13.18                     |
| 54                   | b0028A06        | 26442023          | 26591576        | 16.02                     |
| 55                   | b0002C04        | 27060765          | 27214938        | 27.84                     |
| 56                   | a0006K13        | 27522409          | 27682274        | 23.09                     |
| 57                   | a0044I06        | 28135872          | 28292480        | 21.81                     |
| 58                   | a0043P17        | 28526824          | 28683718        | 21.98                     |
| 59                   | a0029A09        | 28940084          | 29079192        | 22.18                     |
| 60                   | a0032C01        | 29475135          | 29677346        | 31.42                     |
| 61                   | a0002G12        | 30075959          | 30187436        | 25.08                     |
| 62                   | a0007B20        | 30824142          | 30835981        | 8.00                      |
| 63                   | a0036J15        | 31222238          | 31387974        | 13.86                     |
| 64                   | a0037D16        | 31313973          | 31498115        | 24.11                     |
| 65                   | a0018G20        | 32094917          | 32274028        | 12.54                     |
| 66                   | b0024I19        | 32507293          | 32633286        | 0.00                      |
| 67                   | b0014O02        | 33010624          | 33123772        | 0.00                      |
| 68                   | a0024G16        | 33587038          | 33745554        | 0.00                      |
| 69                   | b0037O03        | 33832455          | 34023561        | 20.87                     |
| 70                   | a0004L01        | 34316249          | 34466638        | 15.53                     |

| <b>Bd1 long arm</b> |                 |                   |                 |                           |
|---------------------|-----------------|-------------------|-----------------|---------------------------|
| <b>No.</b>          | <b>Clone ID</b> | <b>Start [bp]</b> | <b>End [bp]</b> | <b>Repeat content [%]</b> |
| 1                   | b0011C11        | 38625084          | 38768816        | 25.98                     |
| 2                   | a0002G19        | 39219901          | 39352626        | 20.11                     |
| 3                   | a0030K01        | 39352642          | 39424325        | 13.60                     |
| 4                   | a0002I22        | 39952805          | 40102980        | 19.01                     |
| 5                   | b0023K21        | 40363127          | 40508554        | 24.17                     |
| 6                   | a0003G01        | 41070484          | 41199669        | 5.68                      |
| 7                   | a0017I18        | 41400831          | 41536057        | 10.35                     |
| 8                   | a0006H08        | 42291978          | 42445395        | 30.82                     |
| 9                   | a0034B17        | 42516220          | 42665540        | 26.89                     |
| 10                  | a0022M24        | 43211660          | 43355407        | 17.71                     |
| 11                  | b0004P09        | 43536825          | 43670757        | 0.00                      |
| 12                  | b0003O14        | 43968448          | 44100412        | 0.00                      |
| 13                  | a0046B04        | 44701450          | 44835069        | 28.04                     |
| 14                  | a0009H21        | 45130478          | 45275483        | 30.09                     |
| 15                  | b0019N18        | 45624834          | 45763826        | 29.21                     |
| 16                  | b0039A23        | 45904934          | 46085862        | 34.61                     |
| 17                  | b0025P22        | 46564769          | 46692954        | 10.03                     |
| 18                  | a0045K11        | 47017729          | 47159607        | 14.08                     |
| 19                  | a0018I01        | 47327837          | 47472575        | 14.80                     |
| 20                  | a0018A03        | 48153393          | 48351371        | 12.13                     |
| 21                  | b0044L08        | 48612347          | 48783561        | 9.01                      |
| 22                  | a0016L07        | 49131764          | 49282548        | 17.24                     |
| 23                  | b0042L08        | 49567141          | 49756854        | 22.48                     |
| 24                  | a0003G14        | 50139085          | 50274374        | 17.12                     |
| 25                  | a0007A17        | 50488742          | 50629310        | 23.81                     |
| 26                  | a0002G03        | 50987420          | 51131768        | 21.02                     |
| 27                  | a0002M19        | 51404954          | 51599184        | 13.45                     |
| 28                  | b0035K24        | 51720482          | 51914140        | 15.53                     |
| 29                  | a0046C24        | 52577876          | 52717406        | 12.29                     |
| 30                  | a0020C13        | 52998818          | 53110321        | 14.83                     |
| 31                  | a0011F10        | 53395079          | 53532078        | 10.55                     |
| 32                  | a0046G17        | 54082210          | 54253048        | 0.00                      |
| 33                  | b0047M09        | 54775761          | 54934862        | 11.12                     |
| 34                  | b0036M23        | 55099293          | 55274619        | 14.70                     |
| 35                  | a0011D03        | 55361479          | 55401129        | 7.86                      |
| 36                  | b0044C20        | 56154348          | 56285508        | 16.71                     |
| 37                  | b0013C18        | 56402015          | 56523891        | 0.00                      |
| 38                  | b0028P17        | 57093738          | 57225377        | 0.00                      |
| 39                  | a0022N20        | 57208701          | 57348499        | 11.96                     |
| 40                  | a0019B04        | 58011832          | 58155264        | 19.18                     |

| <b>Bd1 long arm</b> |                 |                   |                 |                           |
|---------------------|-----------------|-------------------|-----------------|---------------------------|
| <b>No.</b>          | <b>Clone ID</b> | <b>Start [bp]</b> | <b>End [bp]</b> | <b>Repeat content [%]</b> |
| 41                  | b0003K21        | 58350464          | 58480351        | 15.82                     |
| 42                  | a0010A14        | 59503419          | 59676696        | 0.00                      |
| 43                  | a0008E12        | 60079495          | 60251020        | 17.16                     |
| 44                  | a0005H16        | 60258365          | 60413281        | 0.00                      |
| 45                  | b0037A14        | 61095306          | 61288697        | 19.17                     |
| 46                  | a0012H18        | 61475648          | 61619144        | 0.00                      |
| 47                  | b0003A21        | 61920716          | 62077069        | 0.00                      |
| 48                  | a0034M17        | 62501248          | 62642447        | 0.00                      |
| 49                  | a0045D19        | 63062019          | 63221983        | 14.31                     |
| 50                  | b0022G04        | 63557791          | 63711230        | 17.60                     |
| 51                  | a0013D23        | 64120769          | 64297730        | 16.02                     |
| 52                  | b0011I02        | 64559074          | 64702171        | 27.84                     |
| 53                  | a0003I14        | 65067565          | 65202176        | 23.09                     |
| 54                  | a0046P14        | 65376014          | 65522455        | 21.81                     |
| 55                  | a0009I15        | 65946210          | 66098108        | 21.98                     |
| 56                  | b0026H13        | 66197674          | 66346594        | 22.18                     |
| 57                  | b0030D22        | 67065313          | 67205367        | 25.08                     |
| 58                  | a0019B19        | 67392232          | 67529032        | 8.00                      |
| 59                  | b0003K24        | 67945518          | 68072820        | 13.86                     |
| 60                  | a0011O07        | 68533765          | 68686250        | 24.11                     |
| 61                  | a0043A05        | 68898017          | 69053532        | 12.54                     |
| 62                  | b0004O01        | 69023274          | 69164463        | 23.47                     |
| 63                  | b0039M08        | 69966292          | 70146601        | 29.34                     |
| 64                  | a0040G14        | 70435911          | 70578835        | 17.94                     |
| 65                  | b0017K19        | 71146553          | 71281318        | 0.00                      |
| 66                  | a0021F18        | 71455475          | 71597258        | 0.00                      |
| 67                  | a0041A08        | 72027767          | 72181888        | 6.97                      |
| 68                  | b0002N07        | 72465040          | 72619352        | 4.45                      |
| 69                  | a0005K09        | 72948475          | 73083942        | 4.87                      |
| 70                  | b0039K17        | 73601518          | 73740071        | 5.12                      |
| 71                  | a0033F06        | 74020535          | 74180685        | 4.77                      |
| 72                  | b0035K23        | 74475472          | 74659792        | 12.79                     |

**Supplementary Table S2. Characteristics of BAC clones used for the chromosome painting of Bd2.**

| <b>Bd2 short arm</b> |                 |                   |                 |                           |
|----------------------|-----------------|-------------------|-----------------|---------------------------|
| <b>No.</b>           | <b>Clone ID</b> | <b>Start [bp]</b> | <b>End [bp]</b> | <b>Repeat content [%]</b> |
| 1                    | a0038A01        | 1022              | 132144          | 4.73                      |
| 2                    | a0026H23        | 501743            | 631176          | 5.15                      |
| 3                    | b0039C09        | 1311448           | 1507438         | 6.21                      |
| 4                    | a0027K15        | 1864643           | 2004976         | 4.27                      |
| 5                    | b0035C01        | 2500100           | 2659222         | 4.28                      |
| 6                    | b0002F19        | 2858161           | 3010741         | 5.64                      |
| 7                    | a0028O04        | 3492740           | 3587755         | 10.20                     |
| 8                    | b0048M15        | 3999943           | 4170302         | 18.58                     |
| 9                    | a0002P22        | 4319740           | 4509765         | 7.60                      |
| 10                   | a0045F24        | 6004397           | 6146555         | 12.87                     |
| 11                   | a0047M10        | 7007047           | 7144308         | 8.94                      |
| 12                   | a0019E04        | 8843922           | 9006117         | 13.80                     |
| 13                   | a0012B07        | 9006125           | 9148678         | 6.31                      |
| 14                   | a0005E09        | 10380990          | 10507985        | 10.31                     |
| 15                   | b0048L18        | 12984227          | 13000547        | 8.85                      |
| 16                   | a0044D02        | 14006553          | 14195269        | 11.10                     |
| 17                   | a0017D02        | 15866689          | 16021967        | 17.90                     |
| 18                   | a0031J04        | 16021976          | 16162135        | 12.06                     |
| 19                   | a0047D12        | 17856422          | 17996794        | 27.25                     |
| 20                   | a0021H13        | 18176419          | 18323680        | 28.06                     |
| 21                   | a0026K14        | 19861012          | 20005795        | 15.73                     |
| 22                   | a0043C22        | 20005803          | 20143867        | 25.91                     |
| 23                   | b0006D07        | 20880418          | 21008785        | 17.52                     |
| 24                   | b0015N23        | 21980992          | 22118800        | 12.71                     |
| 25                   | b0038L02        | 22509927          | 22639901        | 23.44                     |
| 26                   | b0011O19        | 25393226          | 25510444        | 14.12                     |

| <b>Bd2 long arm</b> |                 |                   |                 |                           |
|---------------------|-----------------|-------------------|-----------------|---------------------------|
| <b>No.</b>          | <b>Clone ID</b> | <b>Start [bp]</b> | <b>End [bp]</b> | <b>Repeat content [%]</b> |
| 1                   | b0031J17        | 33543920          | 33664342        | 15.14                     |
| 2                   | a0014K11        | 34309867          | 34503922        | 8.53                      |
| 3                   | b0003D21        | 35507055          | 35522066        | 19.01                     |
| 4                   | b0007E06        | 36376507          | 36505573        | 18.82                     |
| 5                   | b0022I07        | 38509106          | 38646001        | 9.09                      |
| 6                   | a0024L09        | 38997728          | 39192842        | 8.39                      |
| 7                   | b0031K20        | 39779799          | 39931474        | 5.43                      |
| 8                   | b0016E24        | 39997753          | 40003453        | 1.65                      |
| 9                   | a0043N06        | 41508421          | 41714064        | 18.78                     |
| 10                  | a0008H07        | 42500887          | 42664133        | 14.08                     |
| 11                  | b0018H13        | 42943153          | 43001509        | 9.64                      |
| 12                  | a0029H05        | 43505258          | 43648404        | 13.83                     |
| 13                  | a0009N24        | 44005924          | 44173470        | 13.71                     |
| 14                  | b0041G17        | 44876290          | 45007631        | 13.75                     |
| 15                  | b0031I09        | 46500135          | 46639653        | 7.51                      |
| 16                  | b0040K17        | 47000159          | 47021312        | 4.78                      |
| 17                  | b0019P09        | 48369110          | 48504229        | 3.43                      |
| 18                  | b0041J21        | 49505774          | 49706051        | 9.11                      |
| 19                  | b0038L04        | 50005019          | 50143082        | 5.40                      |
| 20                  | b0012J01        | 51003290          | 51006240        | 0.00                      |
| 21                  | a0031O24        | 52001822          | 52162247        | 4.16                      |
| 22                  | a0036P06        | 52875522          | 53003468        | 5.61                      |
| 23                  | a0027O24        | 53007896          | 53168487        | 8.87                      |
| 24                  | b0040O17        | 53370233          | 53504052        | 4.56                      |
| 25                  | b0036G07        | 53816466          | 54010118        | 3.84                      |
| 26                  | b0027N08        | 54420021          | 54540398        | 9.29                      |
| 27                  | b0047O03        | 55698147          | 55846468        | 5.48                      |
| 28                  | a0038M22        | 56336703          | 56502216        | 4.16                      |
| 29                  | a0038G14        | 57002804          | 57148130        | 7.24                      |

**Supplementary Table S3. Characteristics of BAC clones used for the chromosome painting of Bd3.**

| <b>Bd3 short arm</b> |                 |                   |                 |                           |
|----------------------|-----------------|-------------------|-----------------|---------------------------|
| <b>No.</b>           | <b>Clone ID</b> | <b>Start [bp]</b> | <b>End [bp]</b> | <b>Repeat content [%]</b> |
| 1                    | a0019P17        | 353866            | 501536          | 12.96                     |
| 2                    | a0001O14        | 501589            | 646912          | 10.33                     |
| 3                    | b0028O16        | 856255            | 1007650         | 12.86                     |
| 4                    | a0005B05        | 1000513           | 1146984         | 5.57                      |
| 5                    | a0011O22        | 1330674           | 1507458         | 7.88                      |
| 6                    | a0024P19        | 1507465           | 1643914         | 14.28                     |
| 7                    | b0026H03        | 1872780           | 2007217         | 6.12                      |
| 8                    | b0040M13        | 2318183           | 2506944         | 9.33                      |
| 9                    | b0022F20        | 2505550           | 2655293         | 9.03                      |
| 10                   | a0015A18        | 4001904           | 4157452         | 8.62                      |
| 11                   | a0007G18        | 4853075           | 4999533         | 15.21                     |
| 12                   | b0041N16        | 5017958           | 5207531         | 12.89                     |
| 13                   | a0001N07        | 6854023           | 7004002         | 7.62                      |
| 14                   | a0029A17        | 7006740           | 7159041         | 6.88                      |
| 15                   | b0038O09        | 8001902           | 8135334         | 16.54                     |
| 16                   | b0016A22        | 11505050          | 11712720        | 21.97                     |
| 17                   | b0010J18        | 13993335          | 14131952        | 16.02                     |
| 18                   | a0014K09        | 14869360          | 15008860        | 15.03                     |
| 19                   | b0041F02        | 15002696          | 15181874        | 5.37                      |
| 20                   | a0022G01        | 16038657          | 16055486        | 5.49                      |
| 21                   | a0017B02        | 19002671          | 19154844        | 11.10                     |
| 22                   | b0009N11        | 19496003          | 19508052        | 2.37                      |
| 23                   | a0026C10        | 19503371          | 19692680        | 16.69                     |
| 24                   | a0019E11        | 19840599          | 19994588        | 21.87                     |
| 25                   | b0014A01        | 20363699          | 20508591        | 19.13                     |
| 26                   | a0033D16        | 22106200          | 22299788        | 16.81                     |

| <b>Bd3 long arm</b> |                 |                   |                 |                           |
|---------------------|-----------------|-------------------|-----------------|---------------------------|
| <b>No.</b>          | <b>Clone ID</b> | <b>Start [bp]</b> | <b>End [bp]</b> | <b>Repeat content [%]</b> |
| 1                   | b0002I18        | 29506741          | 29629956        | 11.75                     |
| 2                   | a0036L01        | 31849467          | 32007174        | 15.96                     |
| 3                   | b0007K04        | 34625943          | 34771746        | 18.56                     |
| 4                   | b0032D13        | 36350054          | 36506048        | 18.24                     |
| 5                   | b0011M04        | 36854229          | 37002472        | 5.83                      |
| 6                   | b0025H02        | 37377041          | 37501983        | 7.77                      |
| 7                   | b0035D02        | 37506114          | 37762639        | 19.54                     |
| 8                   | b0047N08        | 40007444          | 40153099        | 19.42                     |
| 9                   | a0047F20        | 40911246          | 41000063        | 9.54                      |
| 10                  | b0036D03        | 41006469          | 41221676        | 17.42                     |
| 11                  | b0015F15        | 41505264          | 41681278        | 7.27                      |
| 12                  | a0013E06        | 42292206          | 42500698        | 12.33                     |
| 13                  | a0033K23        | 42848637          | 43004766        | 13.13                     |
| 14                  | a0043C19        | 43854818          | 44001044        | 17.15                     |
| 15                  | a0038N13        | 44001051          | 44142538        | 18.64                     |
| 16                  | a0005G11        | 47463732          | 47500906        | 8.93                      |
| 17                  | a0043A16        | 48007234          | 48184206        | 19.18                     |
| 18                  | a0026K12        | 48876166          | 49007415        | 8.82                      |
| 19                  | a0026M18        | 49347850          | 49503810        | 4.84                      |
| 20                  | a0018C17        | 49869712          | 50007626        | 7.58                      |
| 21                  | a0019B17        | 50354409          | 50508627        | 7.22                      |
| 22                  | a0025I07        | 50508637          | 50670776        | 9.56                      |
| 23                  | a0037F15        | 50854746          | 51004145        | 4.69                      |
| 24                  | a0018O04        | 52001207          | 52171186        | 16.46                     |
| 25                  | a0023N06        | 52300422          | 52503409        | 11.71                     |
| 26                  | a0037C10        | 52501229          | 52687354        | 9.66                      |
| 27                  | a0024K02        | 53356232          | 53501555        | 12.47                     |
| 28                  | a0030K10        | 54003049          | 54158281        | 4.71                      |
| 29                  | a0028B03        | 54337885          | 54500593        | 16.02                     |
| 30                  | a0002F20        | 54500603          | 54637896        | 3.09                      |
| 31                  | a0008G22        | 55503533          | 55665230        | 5.31                      |
| 32                  | a0043F22        | 56008431          | 56171010        | 19.64                     |
| 33                  | a0044B21        | 56862681          | 57005129        | 9.17                      |
| 34                  | b0034A10        | 57009259          | 57107717        | 7.19                      |
| 35                  | b0037C16        | 57302467          | 57322111        | 1.45                      |
| 36                  | a0008L06        | 57499776          | 57533242        | 7.41                      |
| 37                  | a0020N10        | 57504387          | 57653389        | 5.12                      |

**Supplementary Table S4. Characteristics of BAC clones used for the chromosome painting of Bd4.**

| <b>Bd4 short arm</b> |                 |                   |                 |                           |
|----------------------|-----------------|-------------------|-----------------|---------------------------|
| <b>No.</b>           | <b>Clone ID</b> | <b>Start [bp]</b> | <b>End [bp]</b> | <b>Repeat content [%]</b> |
| 1                    | b0022F16        | 1375208           | 1513070         | 17.05                     |
| 2                    | a0029D03        | 1509327           | 1527857         | 14.80                     |
| 3                    | b0011J07        | 1877049           | 2006504         | 13.50                     |
| 4                    | b0030B12        | 2007584           | 2157984         | 7.19                      |
| 5                    | a0008M09        | 3005577           | 3057490         | 10.02                     |
| 6                    | b0031P08        | 4003479           | 4005284         | 0.00                      |
| 7                    | b0020L19        | 4509871           | 4652127         | 17.87                     |
| 8                    | b0015K04        | 5000667           | 5192928         | 12.52                     |
| 9                    | b0015K04        | 5192351           | 5334608         | 20.17                     |
| 10                   | a0021K11        | 5356098           | 5506730         | 12.85                     |
| 11                   | b0040J03        | 7830905           | 8001843         | 19.13                     |
| 12                   | b0021B09        | 9502901           | 9667864         | 12.35                     |
| 13                   | a0039N16        | 9858184           | 10002657        | 14.32                     |
| 14                   | a0043D11        | 11006774          | 11150531        | 22.28                     |
| 15                   | a0038M23        | 13356537          | 13506604        | 23.57                     |
| 16                   | a0004L13        | 13506625          | 13718798        | 11.46                     |
| 17                   | a0010I18        | 14002249          | 14164264        | 10.04                     |
| 18                   | a0028M13        | 14467770          | 14501426        | 10.11                     |
| 19                   | a0006A19        | 15500025          | 15633790        | 10.64                     |
| 20                   | b0023J07        | 18378813          | 18509732        | 28.56                     |

| <b>Bd4 long arm</b> |                 |                   |                 |                           |
|---------------------|-----------------|-------------------|-----------------|---------------------------|
| <b>No.</b>          | <b>Clone ID</b> | <b>Start [bp]</b> | <b>End [bp]</b> | <b>Repeat content [%]</b> |
| 1                   | a0047K04        | 27639991          | 27795427        | 18.44                     |
| 2                   | b0012C05        | 28999425          | 29071930        | 12.74                     |
| 3                   | a0006J17        | 29358544          | 29516826        | 9.42                      |
| 4                   | b0027J13        | 30855184          | 31004161        | 28.40                     |
| 5                   | a0013N14        | 31000455          | 31132079        | 9.47                      |
| 6                   | a0020D08        | 32504625          | 32642850        | 8.94                      |
| 7                   | b0033J04        | 32835278          | 33001029        | 24.02                     |
| 8                   | a0029H13        | 33008088          | 33024284        | 20.44                     |
| 9                   | b0005K02        | 33865813          | 34006488        | 20.04                     |
| 10                  | b0002F10        | 34027870          | 34141505        | 10.19                     |

| <b>Bd4 long arm</b> |                 |                   |                 |                           |
|---------------------|-----------------|-------------------|-----------------|---------------------------|
| <b>No.</b>          | <b>Clone ID</b> | <b>Start [bp]</b> | <b>End [bp]</b> | <b>Repeat content [%]</b> |
| 11                  | a0021F10        | 35000545          | 35176627        | 26.57                     |
| 12                  | a0011F18        | 36857616          | 37009036        | 26.55                     |
| 13                  | a0031C04        | 37506966          | 37653676        | 24.29                     |
| 14                  | a0004J07        | 38767257          | 38918272        | 6.73                      |
| 15                  | b0021H03        | 38925520          | 39066237        | 14.28                     |
| 16                  | b0035E05        | 39350118          | 39526113        | 6.40                      |
| 17                  | b0014B09        | 39506174          | 39642910        | 17.79                     |
| 18                  | a0024O22        | 39853958          | 40006315        | 16.05                     |
| 19                  | b0041J05        | 40005710          | 40200691        | 17.39                     |
| 20                  | a0032J21        | 40499878          | 40546546        | 5.53                      |
| 21                  | a0003H15        | 40835257          | 41003446        | 12.86                     |
| 22                  | b0047A04        | 41006415          | 41014781        | 22.45                     |
| 23                  | a0047P14        | 41364258          | 41502074        | 13.90                     |
| 24                  | a0026J09        | 41502088          | 41633709        | 24.33                     |
| 25                  | b0032E02        | 41852352          | 42005820        | 21.66                     |
| 26                  | b0026E20        | 42346424          | 42505268        | 15.02                     |
| 27                  | b0038H23        | 42789149          | 43003220        | 6.17                      |
| 28                  | b0023G20        | 43352742          | 43500050        | 9.76                      |
| 29                  | b0019I11        | 43876622          | 44010479        | 6.16                      |
| 30                  | a0004A24        | 44343043          | 44510220        | 7.93                      |
| 31                  | a0043N14        | 45504848          | 45661980        | 6.49                      |
| 32                  | b0043F05        | 46001501          | 46132046        | 15.43                     |
| 33                  | a0030C04        | 46357221          | 46502222        | 7.16                      |
| 34                  | a0004O19        | 46502230          | 46658753        | 9.01                      |
| 35                  | b0031I03        | 46846042          | 47008130        | 20.21                     |
| 36                  | b0026N15        | 47003712          | 47134381        | 8.51                      |
| 37                  | a0017H17        | 47506772          | 47643218        | 6.97                      |
| 38                  | a0024E12        | 48004859          | 48154124        | 3.07                      |
| 39                  | a0041I03        | 48350055          | 48507632        | 9.05                      |

**Supplementary Table S5. Characteristics of BAC clones used for the chromosome painting of Bd5.**

| <b>Bd5 short arm</b> |                 |                   |                 |                           |
|----------------------|-----------------|-------------------|-----------------|---------------------------|
| <b>No.</b>           | <b>Clone ID</b> | <b>Start [bp]</b> | <b>End [bp]</b> | <b>Repeat content [%]</b> |
| 1                    | a0018K07        | 853205            | 1009526         | 16.20                     |
| 2                    | a0019O20        | 1091367           | 1236179         | 16.00                     |
| 3                    | b0041L07        | 2001626           | 2206122         | 23.87                     |
| 4                    | b0010D07        | 2501377           | 2672539         | 21.99                     |

| <b>Bd5 long arm</b> |                 |                   |                 |                           |
|---------------------|-----------------|-------------------|-----------------|---------------------------|
| <b>No.</b>          | <b>Clone ID</b> | <b>Start [bp]</b> | <b>End [bp]</b> | <b>Repeat content [%]</b> |
| 1                   | a0045F23        | 13499779          | 13653343        | 18.89                     |
| 2                   | b0030K21        | 15304885          | 15505515        | 22.56                     |
| 3                   | a0026M04        | 17499731          | 17633162        | 23.72                     |
| 4                   | a0023L21        | 17634500          | 17679830        | 4.89                      |
| 5                   | a0001F13        | 17802975          | 18003203        | 23.52                     |
| 6                   | a0017D24        | 18003221          | 18155770        | 16.96                     |
| 7                   | b0042J14        | 18312982          | 18503857        | 19.62                     |
| 8                   | a0046O09        | 20358624          | 20503060        | 24.99                     |
| 9                   | b0024J19        | 20845837          | 21003148        | 11.02                     |
| 10                  | b0033K07        | 21003184          | 21110356        | 11.5                      |
| 11                  | b0037B05        | 21507488          | 21710347        | 23.77                     |
| 12                  | b0016H11        | 21877774          | 22006306        | 16.69                     |
| 13                  | b0041K21        | 23480858          | 23500119        | 1.39                      |
| 14                  | b0032J06        | 23870997          | 24003288        | 6.19                      |
| 15                  | a0045J11        | 24003128          | 24154997        | 9.3                       |
| 16                  | a0026B16        | 24841254          | 25002060        | 5.96                      |
| 17                  | a0031B15        | 25503136          | 25695070        | 4.94                      |
| 18                  | a0023B07        | 25746075          | 25906029        | 8.99                      |
| 19                  | a0019J13        | 25906054          | 26098440        | 3.35                      |
